## THE ANESTHESIOLOGIST AND HEALTH CARE REDESIGN

“If you want to change the way people work, change the building they work in” is an axiom in architecture. This axiom sets the context for a themed issue addressing changes in health care design and delivery. Health care redesign encompasses everything from optimization of current systems to complete reconceptions, and anesthesiologists can be at the center of these important projects. The themed issue is complementary to the Journal Symposium, which will be held at ANESTHESIOLOGY® 2015 in San Diego, California.

To facilitate discussion on this topic, ANESTHESIOLOGY issues this call for original research papers on a themed issue, “The Anesthesiologist and Health Care Redesign.” This supplement is guest edited by James Rathmell, M.D., and Warren Sandberg, M.D. Submissions of original research are sought on topics such as altering health care delivery systems, perioperative health care delivery, and the value prospect for patients. Submitting a paper does not require attendance at ANESTHESIOLOGY 2015 in San Diego.

**Deadline for submission is August 1, 2015.**

# Applications Sought for FAER Research Grant Funding

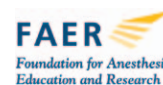

## Opportunities for Faculty Members and Trainees: Apply by August 15, 2015

The board of directors of the Foundation for Anesthesia Education and Research (FAER) is pleased to announce FAER's 2015 research grant funding opportunities.

FAER provides research grant funding for anesthesiologists and anesthesiology trainees to gain additional training in basic science, clinical and translational, health services and education research. For early-career anesthesiologists interested in pursuing careers as physician-scientists, FAER grants can be an important starting point. These grants aim to help anesthesiologists develop the skills and preliminary data they need to become independent investigators.

### 2015 FUNDING OPPORTUNITIES

**The following research grant funding opportunities are available to anesthesiologists and anesthesiology trainees. The application Web site for the summer/fall 2015 grant funding cycle is open June 1 through August 15, 2015.**

For more information regarding FAER grants and eligibility requirements, visit [FAER.org/research-grants](http://FAER.org/research-grants) or email Jody Clikeman at [JodyClikeman@faer.org](mailto:JodyClikeman@faer.org).

#### Mentored Research Training Grants

*Research Areas:* Basic Science (MRTG-BS), Clinical and Translational (MRTG-CT), Health Services Research (MRTG-HSR)\*

*Purpose:* To help physician anesthesiologists develop the skills and preliminary data to become independent investigators

*For Whom:* Faculty members who completed core anesthesiology residency within the past 10 years

*Funding:* \$175,000

*Duration:* Two years

*Percent Research:* 75%

\*The MRTG-HSR is jointly sponsored by the Anesthesia Quality Institute.

#### Research Fellowship Grant

*Research Areas:* Basic Science, Clinical and Translational, Health Services or Education

*Purpose:* To provide significant training in research techniques and scientific methods

*For Whom:* Anesthesiology trainee after the CA-1 year

*Funding:* \$75,000

*Duration:* One year

*Percent Research:* 80%

#### Research in Education Grant

*Research Areas:* Education Research

*Purpose:* To improve the quality and impact of anesthesiology education research

*For Whom:* Faculty member of any rank (junior or senior faculty)

*Funding:* \$100,000

*Duration:* Two years

*Percent Research:* 40%

### RESEARCH GRANT APPLICATION DEADLINES

Summer/Fall Funding Cycle

Online application opens June 1, 2015

Applications due August 15, 2015

Award notifications made by November 15, 2015

Project start date January 1, 2016, or July 1, 2016

Winter/Spring Funding Cycle

Online application opens November 1, 2015

Applications due February 15, 2016

Award notifications made by May 15, 2016

Project start date July 1, 2016, or January 1, 2017

### RESEARCH GRANT ELIGIBILITY CRITERIA—UPDATED FOR 2015

The FAER Grant Management Committee has made a few changes and clarifications to the eligibility criteria and rules for research grant funding from previous years.

- Applicants may submit only one grant application per award cycle.
- Tuition is not allowed in the budget for any grant.
- The applicant and the primary mentor for the grant must be at the same institution.

To view the complete eligibility requirements and application guide, visit [FAER.org/research-grants](http://FAER.org/research-grants).
